# Supplementary material for: Tunable pseudocapacitive contribution by dimension control in nanocrystalline-constructed (Mg0.2Co0.2Ni0.2Cu0.2Zn0.2)O solid solutions to achieve superior lithium-storage properties
Source: Royal Society of Chemistry journal article supplement (doi:10.1039/c9ra05508h), 2019-01-01
Supplement: c9ra05508h1.pdf [file c9ra05508h1.pdf]

## Electronic Supplementary Information (ESI)

for

### **Tunable pseudocapacitive contribution by dimension control in nanocrystalline-constructed $(\text{Mg}_{0.2}\text{Co}_{0.2}\text{Ni}_{0.2}\text{Cu}_{0.2}\text{Zn}_{0.2})\text{O}$ solid solutions to achieve superior lithium-storage properties**

Hong Chen,<sup>a</sup> Nan Qiu,<sup>a,\*</sup> Baozhen Wu,<sup>a</sup> Zhaoming Yang,<sup>a</sup> Sen Sun,<sup>a</sup> and Yuan Wang<sup>a,\*</sup>

<sup>a</sup> Key Laboratory of Radiation Physics and Technology, Ministry of Education, Institute of Nuclear Science and Technology, Sichuan University, Chengdu 610064, People's Republic of China.

\* Corresponding authors

E-mail: [qiun@scu.edu.cn](mailto:qiun@scu.edu.cn) (N. Q.) and [w yuan@scu.edu.cn](mailto:w yuan@scu.edu.cn) (Y. W.)

#### **Table of Contents:**

|                                                                                                                                                |
|------------------------------------------------------------------------------------------------------------------------------------------------|
| <b>Figure S1.</b> XPS spectrum of the as-prepared HEO-Film.                                                                                    |
| <b>Figure S2.</b> STEM-EDS analysis of the as-prepared HEO-Film on a gold grid.                                                                |
| <b>Figure S3.</b> Surface and cross-section SEM images of the as-deposited HEO thin film.                                                      |
| <b>Figure S4.</b> The enlarged HRTEM pattern of <b>Figure 4(c)</b> .                                                                           |
| <b>Figure S5.</b> CV curves of HEO-36h, HEO-48h, HEO-60h and HEO-72h electrodes at a scan rate of 0.2 mV s <sup>-1</sup> .                     |
| <b>Figure S6.</b> CV curves of HEO-Film electrode at a scan rate of 0.2 mV s <sup>-1</sup> .                                                   |
| <b>Figure S7.</b> Discharge-charge voltage profiles of HEO electrodes for 150th cycles at a current rate of 200 mA g <sup>-1</sup> .           |
| <b>Figure S8.</b> Correlation between the scan rates and corresponding currents of the HEO-Film electrode at (a) anodic and (b) cathodic scan. |
| <b>Figure S9.</b> The capacitive contribution to the total current contribution for the HEO-36h electrode.                                     |
| <b>Figure S10.</b> The capacitive contribution to the total current contribution for the HEO-48h electrode.                                    |
| <b>Figure S11.</b> The capacitive contribution to the total current contribution for the HEO-60h electrode.                                    |
| <b>Figure S12.</b> The capacitive contribution to the total current contribution for the HEO-72h electrode.                                    |
| <b>Figure S13.</b> The capacitive contribution to the total current contribution for the HEO-Film electrode.                                   |
| <b>Figure S14.</b> Determination of lithium-ion diffusion coefficients (D) by electrochemical                                                  |

impedance spectroscopy (EIS) measurements.

**Table S1.** The kinetic parameters of different HEO samples at cut-off potential of 0.01, 1.0 1.5, 2.0, 2.5 and 3.0 V.

**Figure S15.** The lithium-ion diffusion coefficients (D) of different HEO samples at cut-off potential of 0.01, 1.0 1.5, 2.0, 2.5 and 3.0 V.

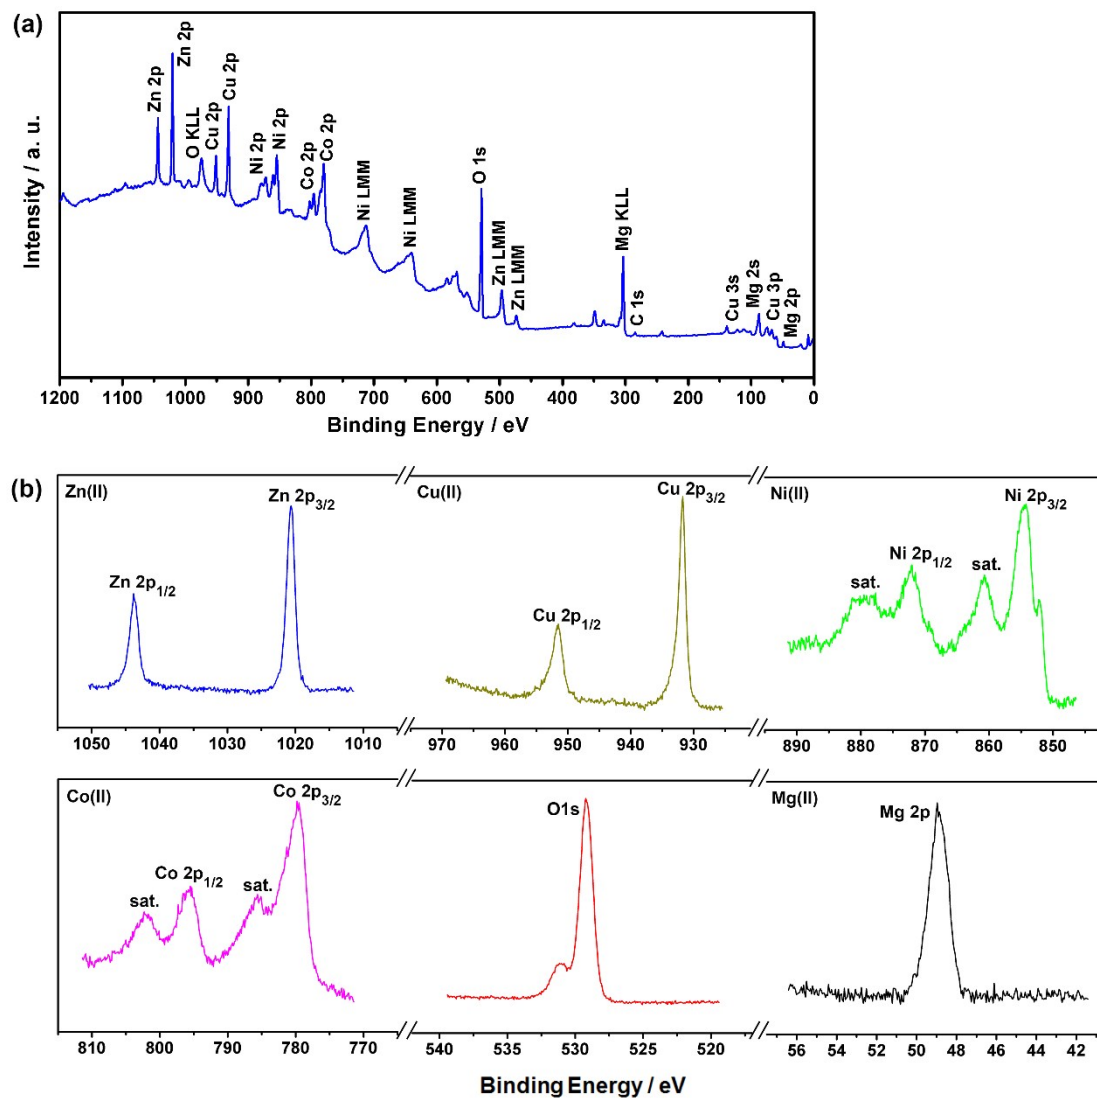

**Figure S1.** XPS spectrum of the as-prepared HEO-Film, (a) Survey scan; and (b) High-resolution XPS spectra of Zn 2p, Cu 2p, Ni 2p, Co 2p, O 1s, Mg 2p.

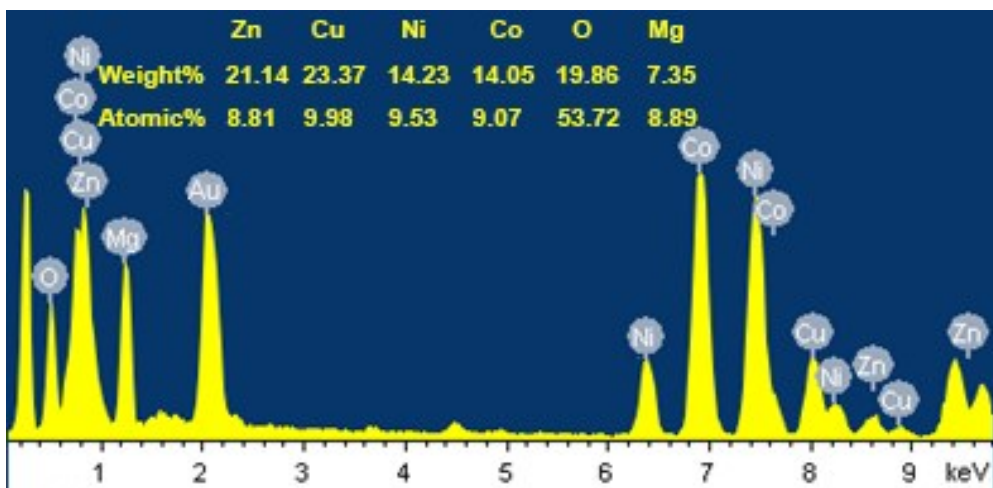

**Figure S2.** STEM-EDS analysis of the as-prepared HEO-Film on a gold grid. The corresponding element atomic ratio indicate the homogeneous spatial distributions of each element.

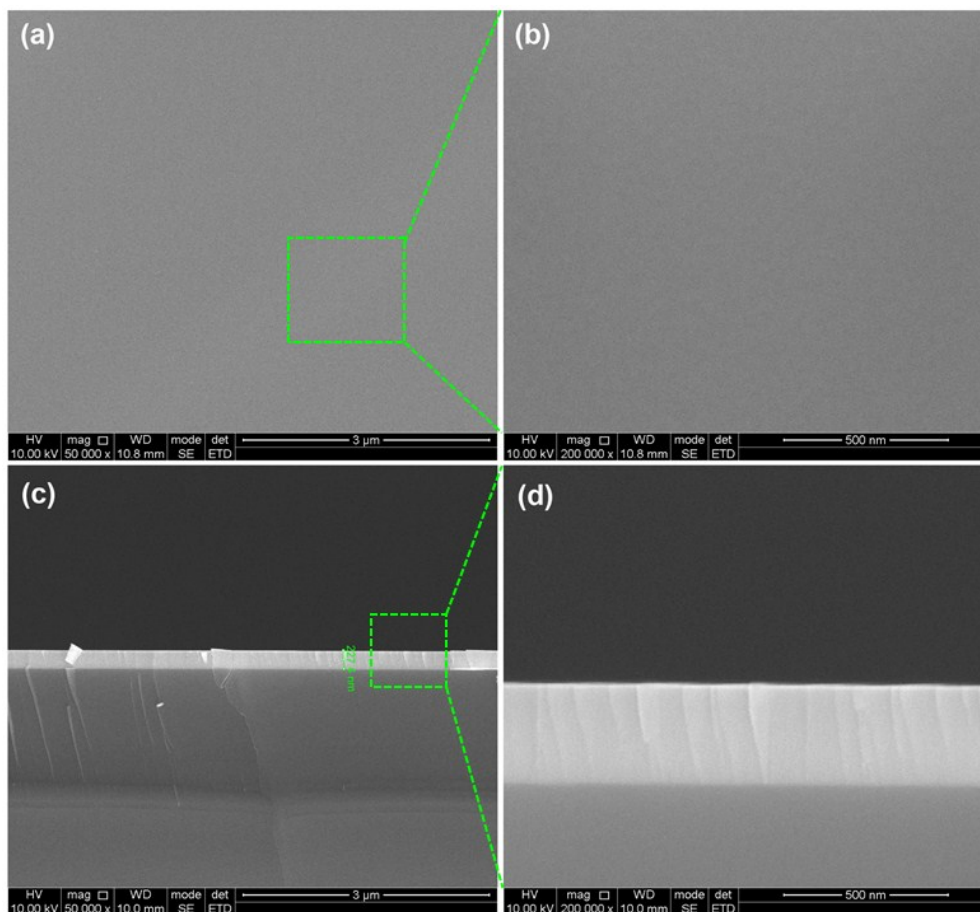

**Figure S3.** (a-b) Surface and (c-d) cross-section SEM images of the as-deposited HEO thin film.

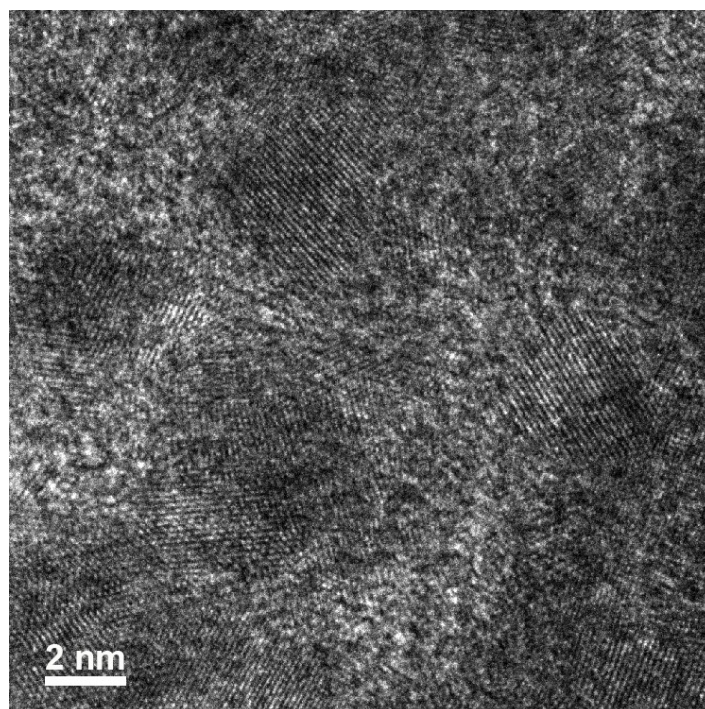

**Figure S4.** The enlarged HRTEM pattern of **Figure 4(c)**.

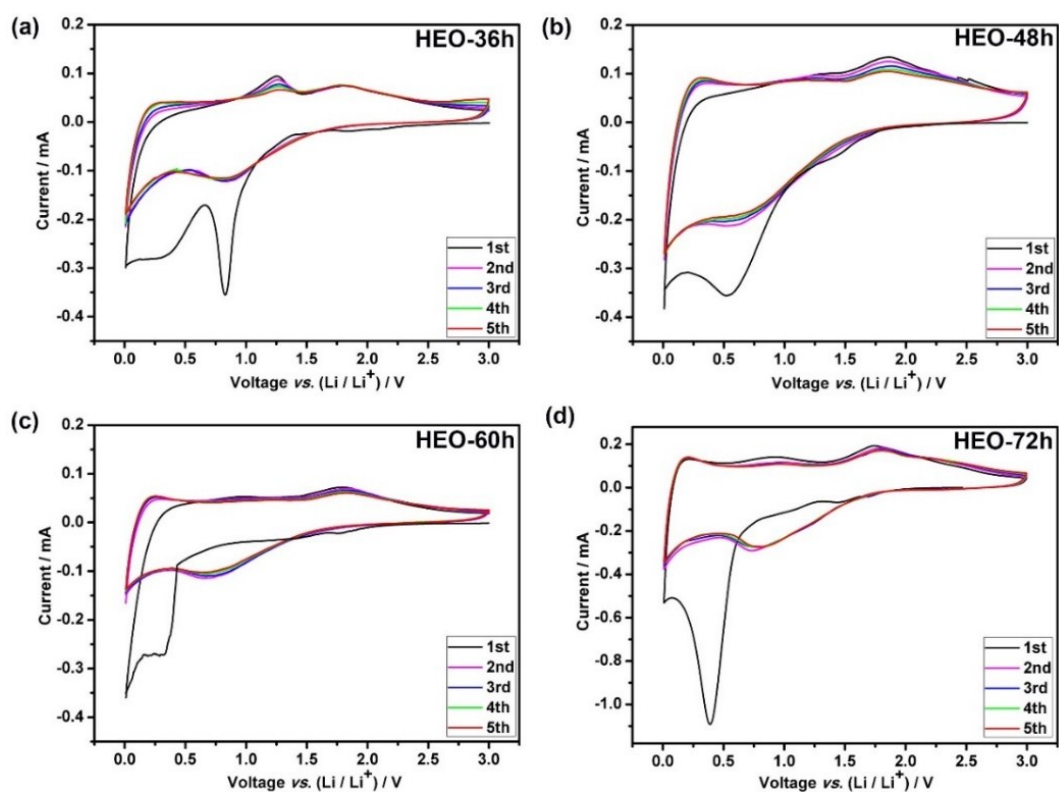

**Figure S5.** CV curves of (a) HEO-36h, (b) HEO-48h, (c) HEO-60h and (d) HEO-72h electrodes at a scan rate of  $0.2 \text{ mV s}^{-1}$ .

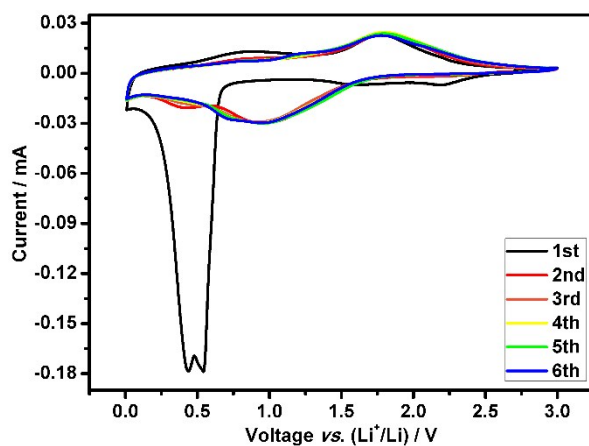

**Figure S6.** CV curve of HEO-Film electrode at a scan rate of  $0.2 \text{ mV s}^{-1}$ .

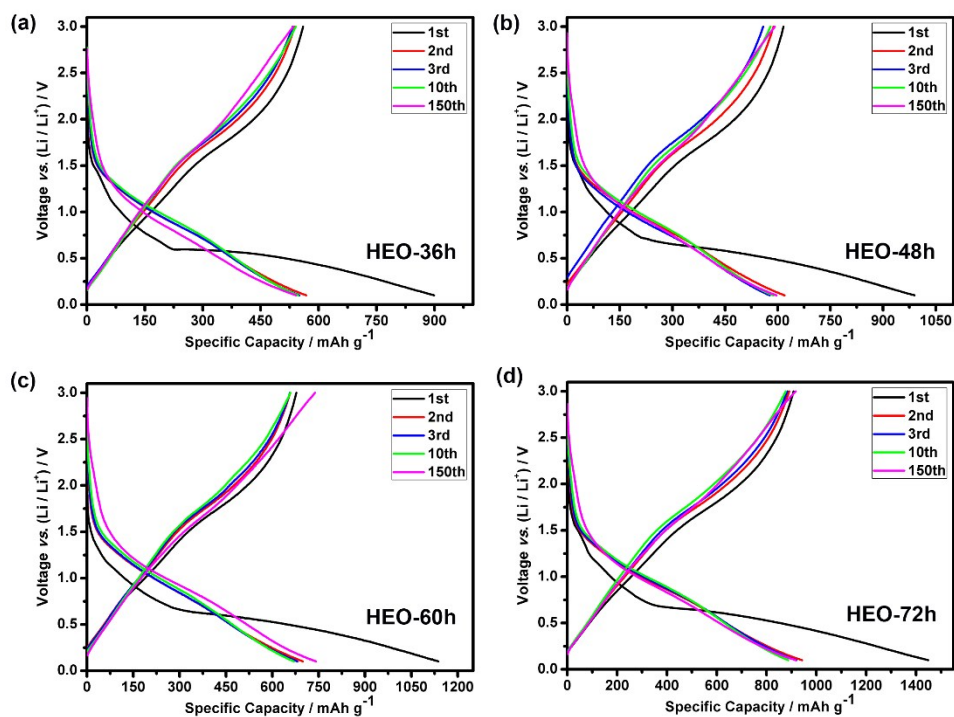

**Figure S7.** Discharge-charge voltage profiles of HEO electrodes for the 1st, 2nd, 3rd, 10th, and 150th cycles in the voltage range of 0.01-3.00 V at a current rate of  $200 \text{ mA g}^{-1}$ .

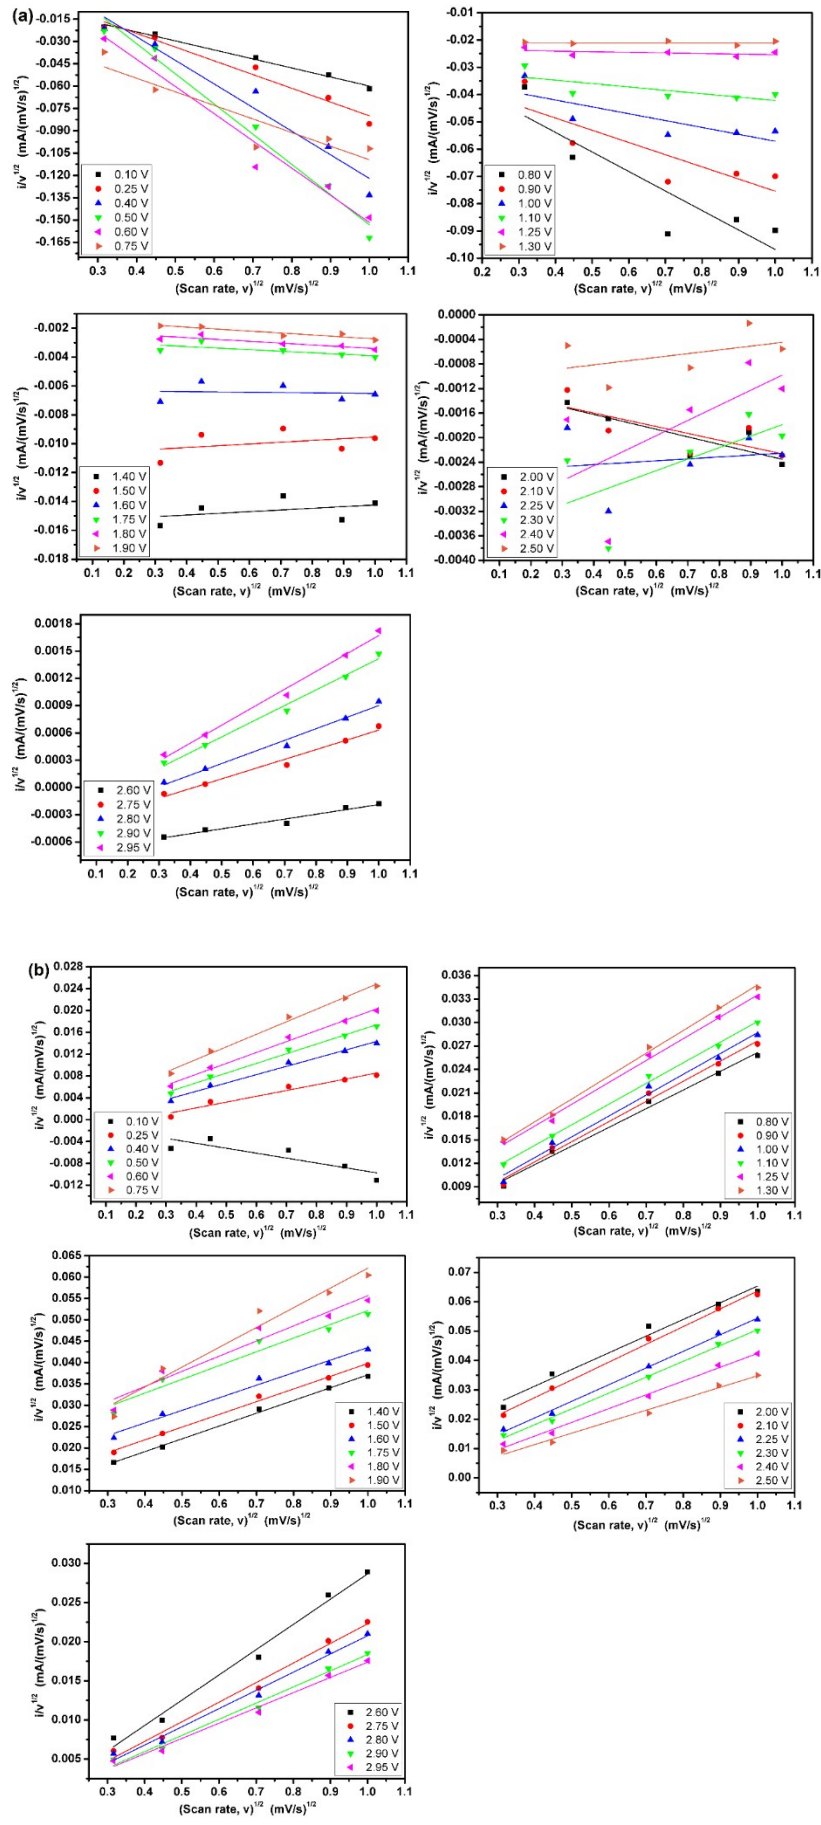

**Figure S8.** Correlation between the scan rates and corresponding currents of the HEO-Film electrode at (a) anodic and (b) cathodic scan according to equation:  $i(V)/v^{1/2} = k_1v^{1/2} + k_2$ .

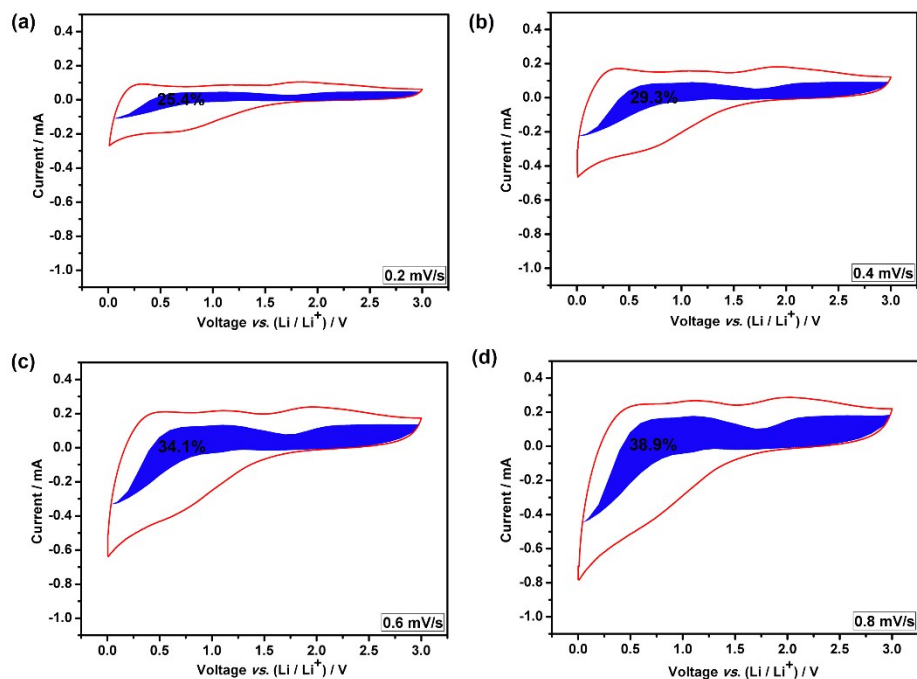

**Figure S9.** The capacitive contribution (blue shaded region) to the total current contribution (red line) for the HEO-36h electrode at (a) 0.2, (b) 0.4, (c) 0.6, (d) 0.8  $\text{mV s}^{-1}$  vs.  $\text{Li}^+/\text{Li}$ .

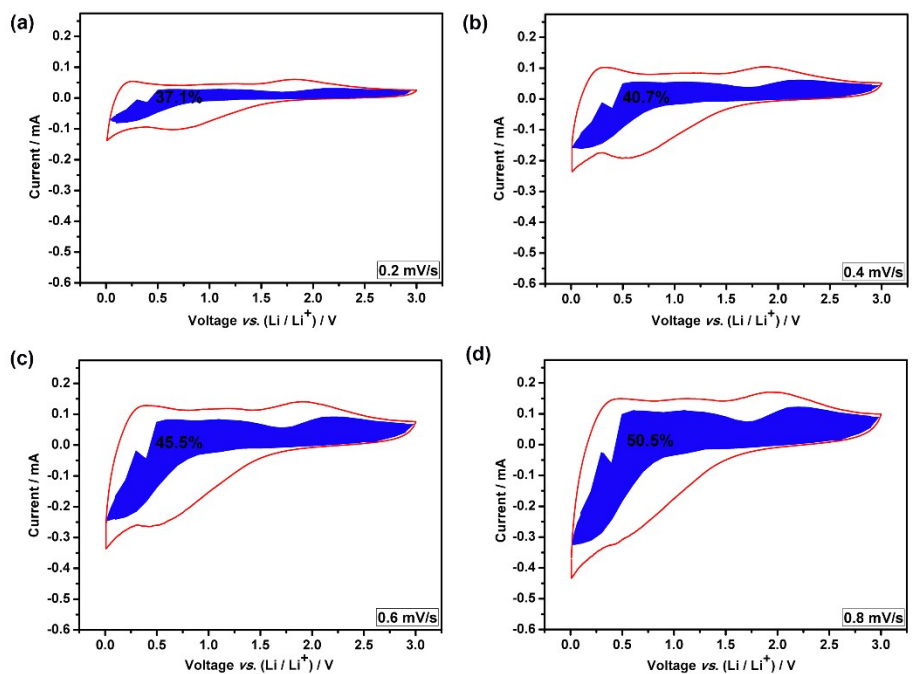

**Figure S10.** The capacitive contribution (blue shaded region) to the total current contribution (red line) for the HEO-48h electrode at (a) 0.2, (b) 0.4, (c) 0.6, (d) 0.8  $\text{mV s}^{-1}$  vs.  $\text{Li}^+/\text{Li}$ .

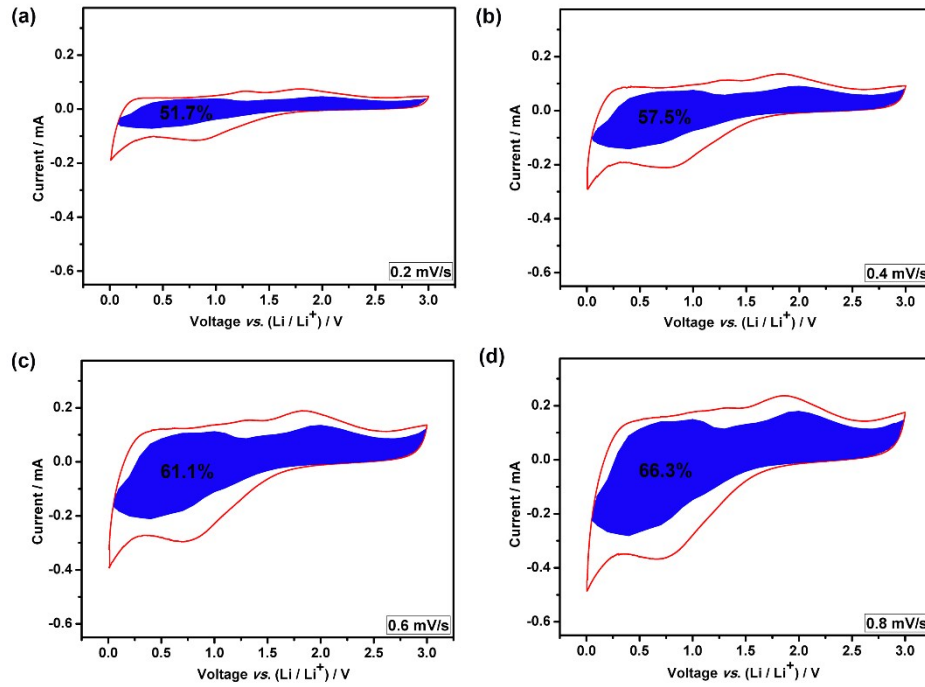

**Figure S11.** The capacitive contribution (blue shaded region) to the total current contribution (red line) for the HEO-60h electrode at (a) 0.2, (b) 0.4, (c) 0.6, (d) 0.8 mV s<sup>-1</sup> vs. Li<sup>+</sup>/Li.

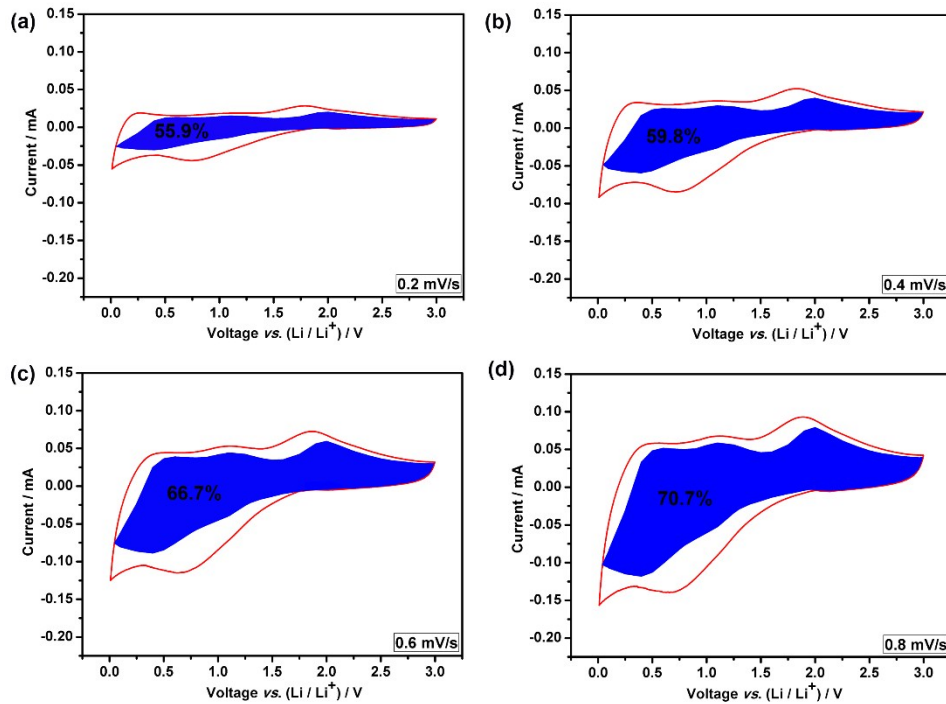

**Figure S12.** The capacitive contribution (blue shaded region) to the total current contribution (red line) for the HEO-72h electrode at (a) 0.2, (b) 0.4, (c) 0.6, (d) 0.8 mV s<sup>-1</sup> vs. Li<sup>+</sup>/Li.



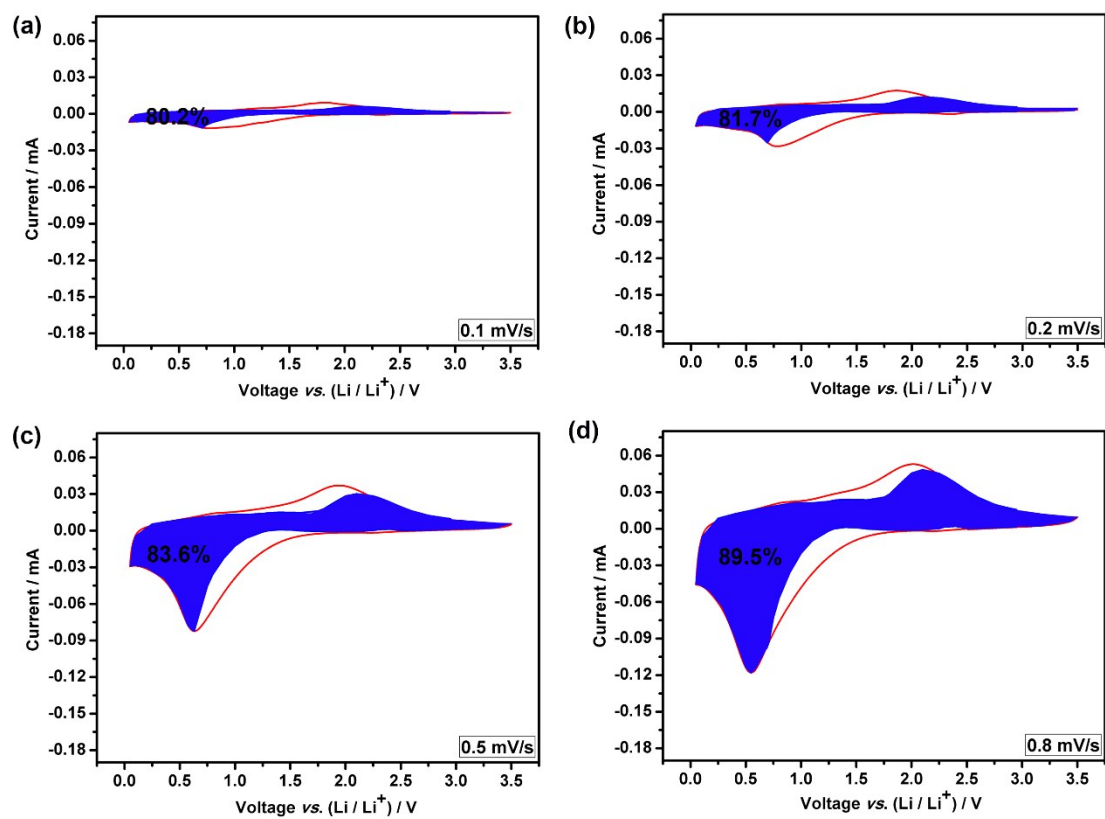

**Figure S13.** The capacitive contribution (blue shaded region) to the total current contribution (red line) for the HEO-Film electrode at (a) 0.1, (b) 0.2, (c) 0.5, (d) 0.8 mV s<sup>-1</sup> vs. Li<sup>+</sup>/Li.

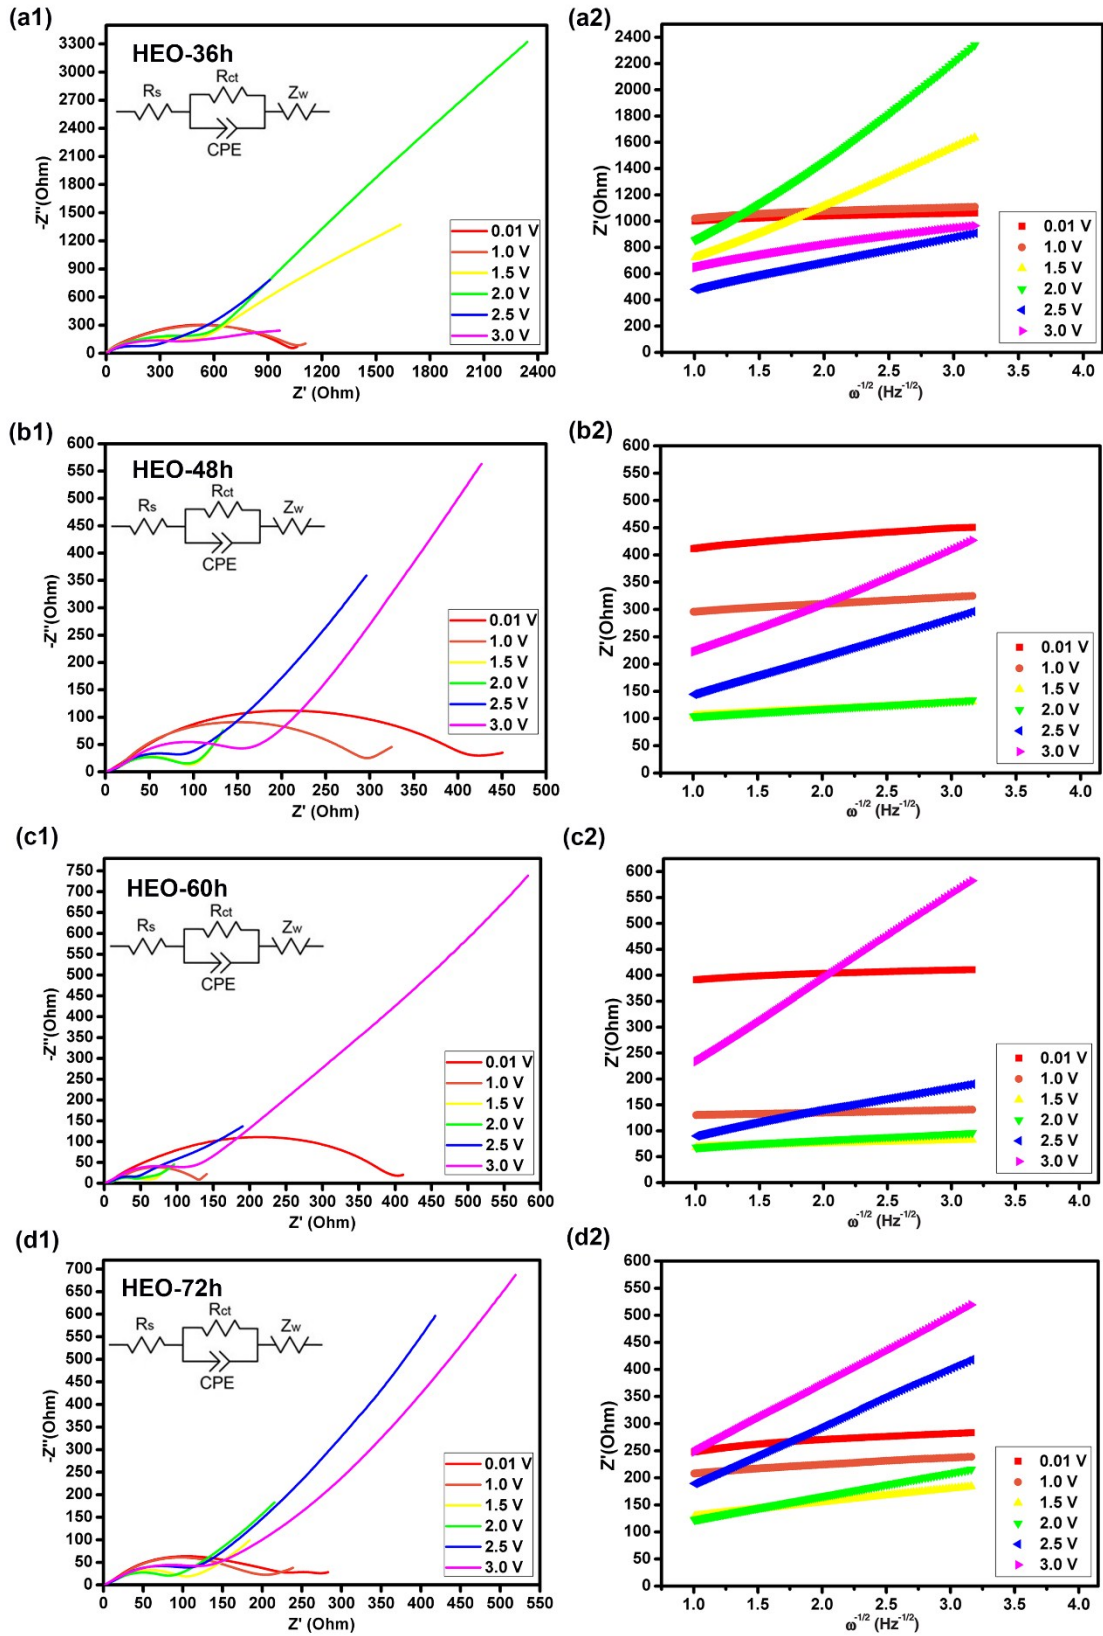

**Figure S14.** Determination of lithium-ion diffusion coefficients ( $D$ ) by electrochemical impedance spectroscopy (EIS) measurements according to  $D = R^2 T^2 / 2 A^2 n^4 F^4 C^2 \sigma^2$ , where  $R$ ,  $T$ ,  $A$ ,  $n$ ,  $F$ , and  $C$  are the gas constant, absolute temperature, electrode area, electron transfer

number, Faraday constant, and lithium-ion molar concentration, respectively. The  $\sigma$  value (Warburg factor) can be calculated by  $Z' = R_s + R_{ct} + \sigma\omega^{-1/2}$  from the low-frequency plots of EIS, and  $\omega$  is the corresponding angular frequency.

| Samples          | $R_s$ [ $\Omega$ ] | $R_{ct}$ [ $\Omega$ ] | $\sigma$ [ $\Omega \text{ Hz}^{1/2}$ ] | $D_{Li}$ [ $\text{cm}^2 \text{ s}^{-1}$ ] |
|------------------|--------------------|-----------------------|----------------------------------------|-------------------------------------------|
| HEO-36h (0.01 V) | 1.89               | 979.21                | 27.3                                   | $9.38 \times 10^{-13}$                    |
| HEO-36h (1.0 V)  | 1.83               | 991.15                | 39.1                                   | $4.60 \times 10^{-13}$                    |
| HEO-36h (1.5 V)  | 1.75               | 274.32                | 425.0                                  | $3.93 \times 10^{-15}$                    |
| HEO-36h (2.0 V)  | 1.41               | 117.23                | 682.4                                  | $1.52 \times 10^{-15}$                    |
| HEO-36h (2.5 V)  | 1.45               | 291.33                | 195.7                                  | $1.81 \times 10^{-14}$                    |
| HEO-36h (3.0 V)  | 1.87               | 511.79                | 148.6                                  | $3.21 \times 10^{-14}$                    |
| HEO-48h (0.01 V) | 3.87               | 391.54                | 18.3                                   | $2.13 \times 10^{-12}$                    |
| HEO-48h (1.0 V)  | 3.02               | 280.48                | 13.1                                   | $4.11 \times 10^{-12}$                    |
| HEO-48h (1.5 V)  | 2.89               | 90.03                 | 11.9                                   | $5.09 \times 10^{-12}$                    |
| HEO-48h (2.0 V)  | 3.05               | 87.89                 | 13.4                                   | $3.88 \times 10^{-12}$                    |
| HEO-48h (2.5 V)  | 2.71               | 71.75                 | 69.7                                   | $1.47 \times 10^{-14}$                    |
| HEO-48h (3.0 V)  | 2.39               | 122.08                | 93.1                                   | $8.14 \times 10^{-14}$                    |
| HEO-60h (0.01 V) | 4.41               | 380.46                | 8.7                                    | $3.59 \times 10^{-14}$                    |
| HEO-60h (1.0 V)  | 3.49               | 122.21                | 4.9                                    | $1.21 \times 10^{-13}$                    |
| HEO-60h (1.5 V)  | 3.11               | 58.85                 | 6.7                                    | $6.19 \times 10^{-14}$                    |
| HEO-60h (2.0 V)  | 3.10               | 53.61                 | 12.4                                   | $1.75 \times 10^{-14}$                    |
| HEO-60h (2.5 V)  | 2.50               | 44.71                 | 45.9                                   | $1.33 \times 10^{-15}$                    |
| HEO-60h (3.0 V)  | 2.30               | 64.47                 | 163.8                                  | $1.05 \times 10^{-16}$                    |
| HEO-72h (0.01 V) | 2.84               | 234.00                | 15.9                                   | $7.05 \times 10^{-12}$                    |
| HEO-72h (1.0 V)  | 2.40               | 192.65                | 14.2                                   | $8.39 \times 10^{-12}$                    |
| HEO-72h (1.5 V)  | 2.20               | 101.20                | 25.9                                   | $2.60 \times 10^{-12}$                    |
| HEO-72h (2.0 V)  | 2.29               | 77.21                 | 43.3                                   | $9.35 \times 10^{-13}$                    |
| HEO-72h (2.5 V)  | 2.25               | 78.90                 | 106.9                                  | $1.51 \times 10^{-13}$                    |
| HEO-72h (3.0 V)  | 2.30               | 119.95                | 124.9                                  | $1.15 \times 10^{-13}$                    |

**Table S1.** The kinetic parameters of different HEO samples at cut-off potential of 0.01, 1.0 1.5, 2.0, 2.5 and 3.0 V.

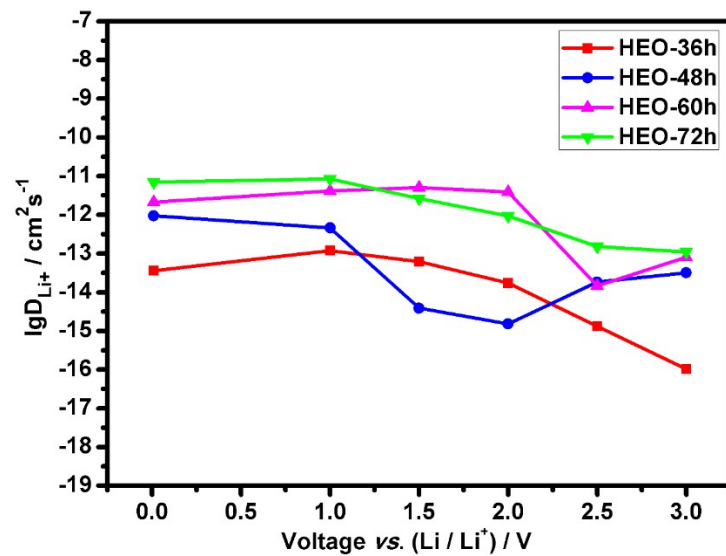

**Figure S15.** The lithium-ion diffusion coefficients ( $D$ ) of different HEO samples at cut-off potential of 0.01, 1.0 1.5, 2.0, 2.5 and 3.0 V.
